# Supplementary material
Source: PubMed Central journal article supplement (PMC8627493)
Supplement: NIHMS1752479-supplement-1.pdf [file NIHMS1752479-supplement-1.pdf]

1 **Supplementary Material**

2 **Supplementary Table 1: Main survey questions used in this**  
3 **manuscript**

|    | Question                         | Answer                                                                                                                                                                                                                                                                                                                                                                                                                             |
|----|----------------------------------|------------------------------------------------------------------------------------------------------------------------------------------------------------------------------------------------------------------------------------------------------------------------------------------------------------------------------------------------------------------------------------------------------------------------------------|
| 4  |                                  |                                                                                                                                                                                                                                                                                                                                                                                                                                    |
| 5  |                                  |                                                                                                                                                                                                                                                                                                                                                                                                                                    |
| 6  |                                  |                                                                                                                                                                                                                                                                                                                                                                                                                                    |
| 7  |                                  |                                                                                                                                                                                                                                                                                                                                                                                                                                    |
| 8  | Age                              | What was your age in years when the formal diagnosis was made? This was your age when first told you were extremely likely to have or definitely had sarcoidosis.                                                                                                                                                                                                                                                                  |
| 9  |                                  | Separate choices                                                                                                                                                                                                                                                                                                                                                                                                                   |
| 10 | Ethnicity                        | Ethnicity Hispanic or Latino                                                                                                                                                                                                                                                                                                                                                                                                       |
| 11 |                                  | Tick box                                                                                                                                                                                                                                                                                                                                                                                                                           |
| 12 | Race                             | American Indian/Alaska native, Asian, Black/African American, Native Hawaiian/Other Pacific Islander, White, some other race and prefer not to answer                                                                                                                                                                                                                                                                              |
| 13 |                                  | Tick box                                                                                                                                                                                                                                                                                                                                                                                                                           |
| 14 |                                  |                                                                                                                                                                                                                                                                                                                                                                                                                                    |
| 15 | Insurance                        | If you have health insurance or a health care plan, what type of health insurance do you currently have?                                                                                                                                                                                                                                                                                                                           |
| 16 |                                  | Select all that apply                                                                                                                                                                                                                                                                                                                                                                                                              |
| 17 |                                  |                                                                                                                                                                                                                                                                                                                                                                                                                                    |
| 18 | Education                        | If you are 18 years or older, what is the highest grade or level of school you completed?                                                                                                                                                                                                                                                                                                                                          |
| 19 |                                  | Separate choices                                                                                                                                                                                                                                                                                                                                                                                                                   |
| 20 | Income                           | What is the annual gross income for the household in which you live (in U.S. dollars)?                                                                                                                                                                                                                                                                                                                                             |
| 21 |                                  | Separate choices                                                                                                                                                                                                                                                                                                                                                                                                                   |
| 22 | Health care providers            | What kind of health care provider(s) did you see for the symptoms BEFORE a diagnosis was made?                                                                                                                                                                                                                                                                                                                                     |
| 23 |                                  | Select all that apply                                                                                                                                                                                                                                                                                                                                                                                                              |
| 24 | Family history of sarcoidosis    | Which family members also are known to have sarcoidosis?                                                                                                                                                                                                                                                                                                                                                                           |
| 25 |                                  | Select all that apply                                                                                                                                                                                                                                                                                                                                                                                                              |
| 26 | Sarcoidosis related admissions   | Have you ever been admitted to the hospital for your sarcoidosis (Not for diagnostic procedures)?                                                                                                                                                                                                                                                                                                                                  |
| 27 |                                  | Yes/no                                                                                                                                                                                                                                                                                                                                                                                                                             |
| 28 |                                  |                                                                                                                                                                                                                                                                                                                                                                                                                                    |
| 29 | Sarcoidosis-specific therapy     | Have you EVER taken medications for sarcoidosis? If Yes, indicate the status of each of the following medications.                                                                                                                                                                                                                                                                                                                 |
| 30 |                                  | Separate choices (completed treatment, have not had this treatment, have not taken medication, never worked, side effects/complications, still using this treatment, stopped working and unsure)                                                                                                                                                                                                                                   |
| 31 |                                  |                                                                                                                                                                                                                                                                                                                                                                                                                                    |
| 32 |                                  |                                                                                                                                                                                                                                                                                                                                                                                                                                    |
| 33 |                                  |                                                                                                                                                                                                                                                                                                                                                                                                                                    |
| 34 |                                  |                                                                                                                                                                                                                                                                                                                                                                                                                                    |
| 35 | Organ involvement                | What organs have been diagnosed with sarcoidosis by a medical provider?                                                                                                                                                                                                                                                                                                                                                            |
| 36 |                                  | Select all that apply/ diagnosed, suspected, not involved and unsure                                                                                                                                                                                                                                                                                                                                                               |
| 37 |                                  |                                                                                                                                                                                                                                                                                                                                                                                                                                    |
| 38 | Endocrine disorders              | Have any of the following endocrine conditions been diagnosed by a physician?                                                                                                                                                                                                                                                                                                                                                      |
| 39 |                                  | Select all that apply                                                                                                                                                                                                                                                                                                                                                                                                              |
|    | Comorbidities                    | Have you developed any of the following disorders AFTER you were given the diagnosis of sarcoidosis?                                                                                                                                                                                                                                                                                                                               |
|    |                                  | Select all that apply                                                                                                                                                                                                                                                                                                                                                                                                              |
|    | Use of antidepressants           | What other medications have you been prescribed for the effects of sarcoidosis and the treatment of side effects (such as anxiety, sleep difficulties, osteoporosis and fatigue)? - Antidepressant or antidepressant/anti-anxiety medications such as citalopram (Celexa), fluoxetine (Prozac), escitalopram (Lexapro), fluvoxamine (Luvox), duloxetine (Cymbalta), venlafaxine (Effexor), paroxetine (Paxil), sertraline (Zoloft) |
|    |                                  | (Select all that apply.)                                                                                                                                                                                                                                                                                                                                                                                                           |
|    | Feeling depressed                | Do you feel depressed?                                                                                                                                                                                                                                                                                                                                                                                                             |
|    |                                  | Tick box (unsure, never, rarely, sometimes, often and always)                                                                                                                                                                                                                                                                                                                                                                      |
|    | Feeling tired                    | How often do you feel tired?                                                                                                                                                                                                                                                                                                                                                                                                       |
|    |                                  | Tick box (unsure, never, rarely, sometimes, often and always)                                                                                                                                                                                                                                                                                                                                                                      |
|    | Use of mobility assistive device | Do you use any type of medical or assistive device(s) to help you move around, communicate, or do things?                                                                                                                                                                                                                                                                                                                          |
|    |                                  | Select all that apply                                                                                                                                                                                                                                                                                                                                                                                                              |
|    | Employment based disability      | What is your employment status?                                                                                                                                                                                                                                                                                                                                                                                                    |
|    |                                  | Select all that apply                                                                                                                                                                                                                                                                                                                                                                                                              |
|    | Missing work days                | How many days of work did you miss due to the diagnosis in the last 12 months?                                                                                                                                                                                                                                                                                                                                                     |
|    |                                  | Separate choices                                                                                                                                                                                                                                                                                                                                                                                                                   |
|    | Sarcoid related job termination  | Have you needed to end your job due to health effects from sarcoidosis?                                                                                                                                                                                                                                                                                                                                                            |
|    |                                  | Yes/No                                                                                                                                                                                                                                                                                                                                                                                                                             |
